# Supplementary material for: Novel fabrication of an efficient solid base: carbon-doped MgO–ZnO composite and its CO2 capture at 473 K
Source: Royal Society of Chemistry journal article supplement (doi:10.1039/c5ta04309c), 2015-01-01
Supplement: c5ta04309c1.pdf [file c5ta04309c1.pdf]

## Supporting Information

### Novel fabrication of efficient solid base: carbon-doped MgO-ZnO composite and its CO<sub>2</sub> capture at 473 K

Yan Yan Li, Mi Mi Wan, Xiao Dan Sun, Jun Zhou, Ying Wang, and Jian Hua Zhu\*

**Table S1.** Carbon content of 82MZ-s, 82MZ-g and 82MZ samples.

| Samples               | 82MZ-s | 82MZ-g | 82MZ |
|-----------------------|--------|--------|------|
| Carbon content (wt-%) | 1.7    | 2.0    | 1.2  |

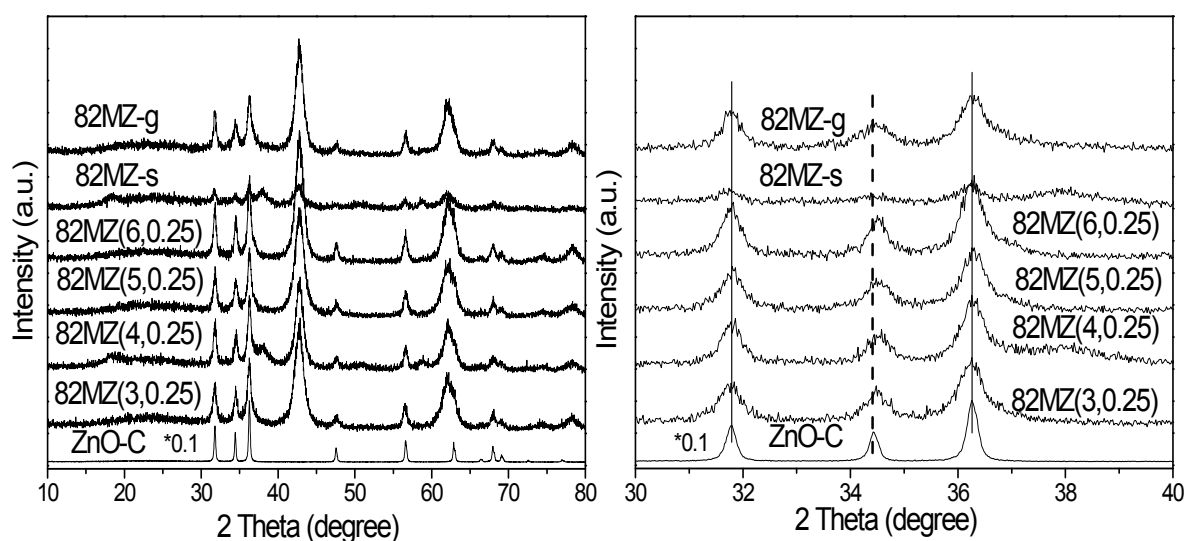

**Figure S1.** (a) Wide-angle XRD patterns of 82MZ (t, v), 82MZ-s, and 82MZ-g composites, (b) the amplified XRD patterns of (a).

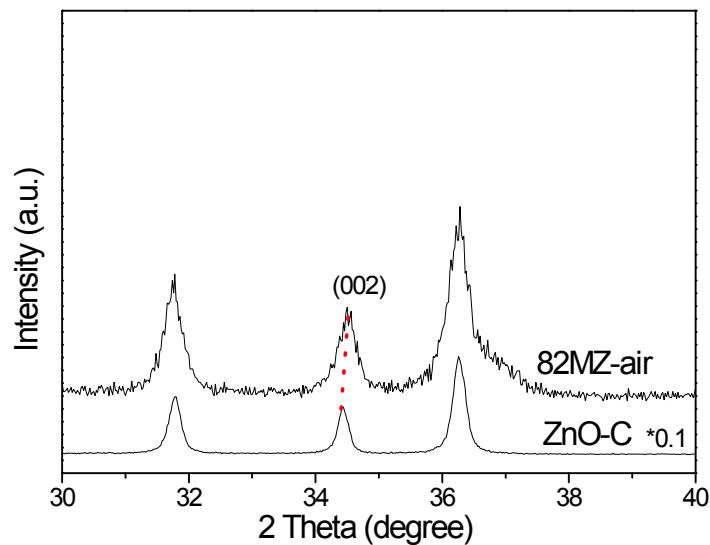

**Figure S2.** Shift of ZnO (002) peak on the wide angle XRD pattern of 82MZ-air sample.

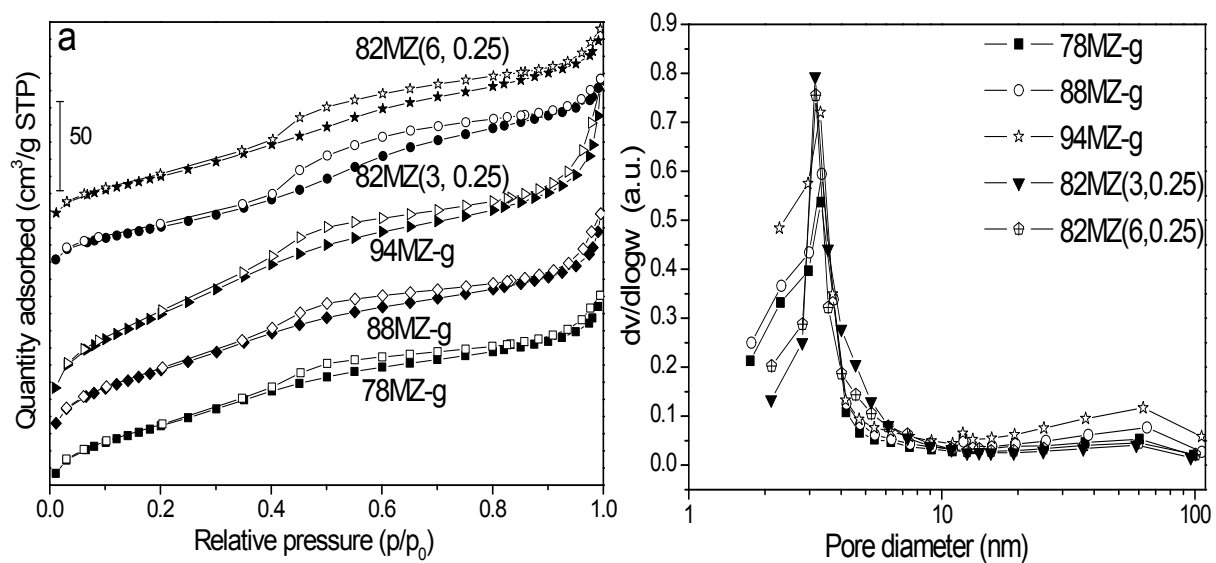

**Figure S3.** (a)  $N_2$  adsorption-desorption isotherms and (b) pore-size distributions of MZ-g and 82MZ (t, v) samples.

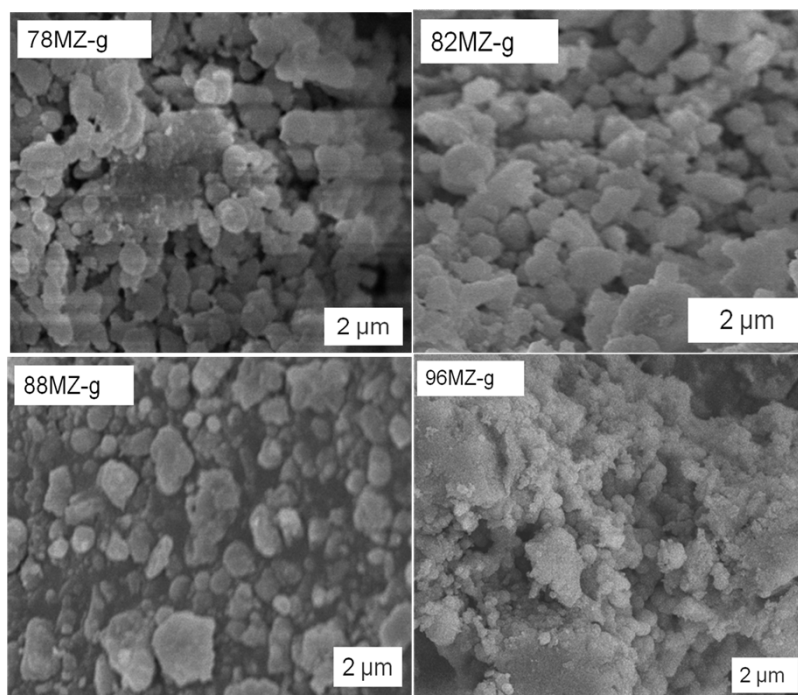

**Figure S4.** SEM images of MZ-g samples.

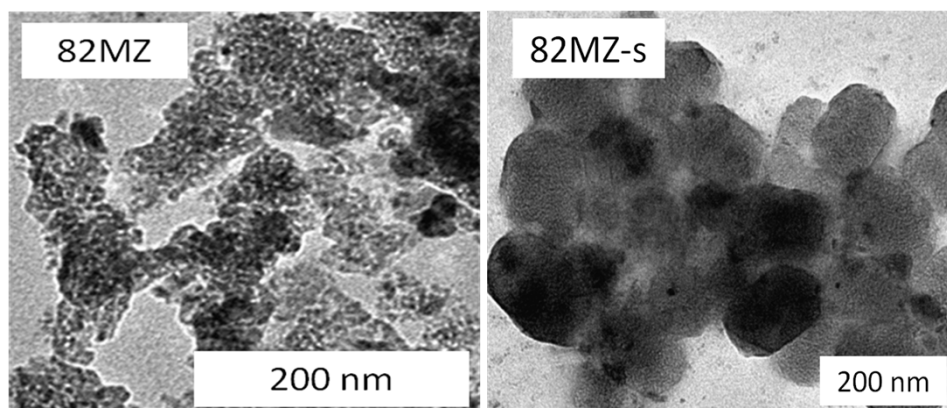

**Figure S5.** TEM images of 82MZ and 82MZ-s samples.

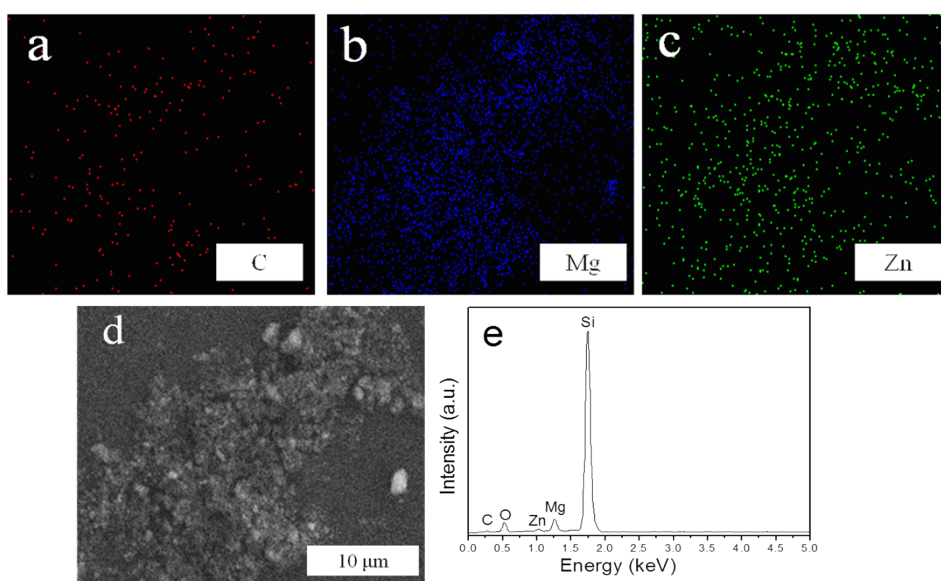

**Figure S6.** X-ray mapping (a, b, c), SEM images (d) and EDX spectrum (e) of 82MZ-s sample, in which the magnification is 4000.

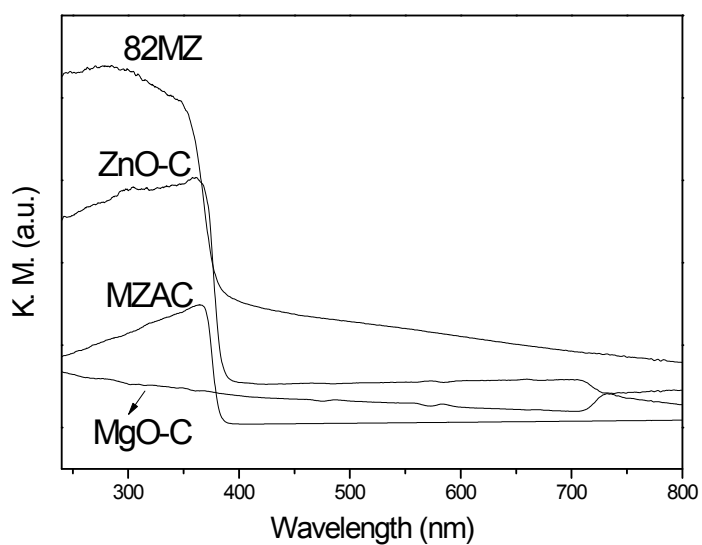

**Figure S7.** UV-vis diffuse reflectance spectra of 82MZ, MZAC, MgO-C and ZnO-C composites.

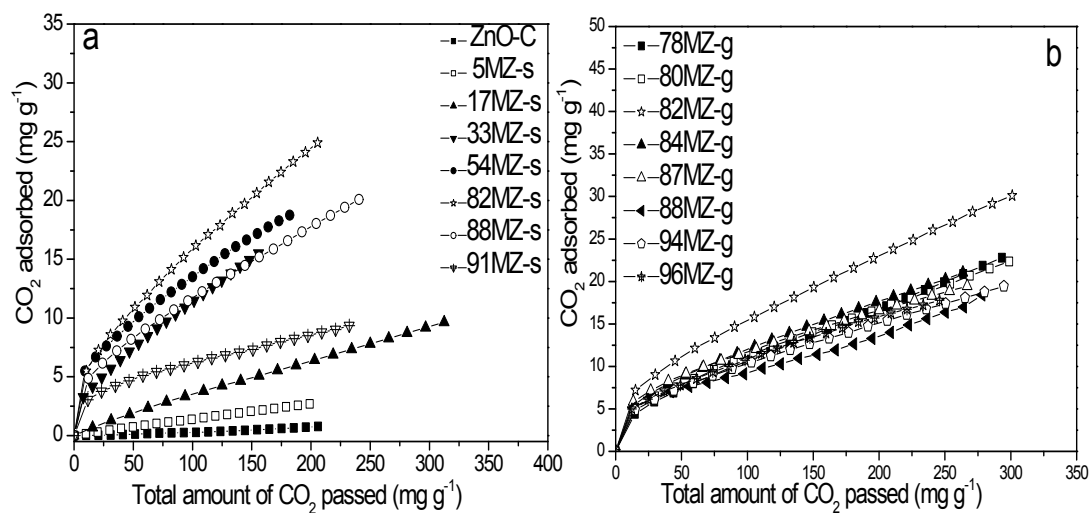

**Figure S8.** Instantaneous CO<sub>2</sub> adsorption at 473 K on the carbon-doped MgO-ZnO composites made from (a) solution-evaporation and (b) grinding methods.

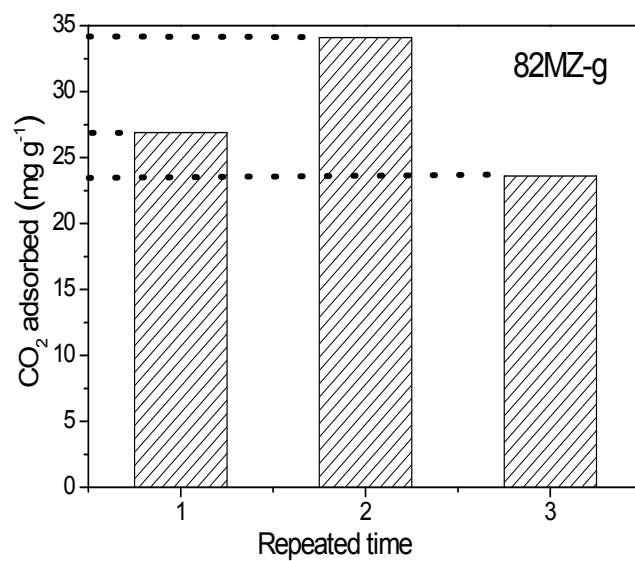

**Figure S9.** Repeated CO<sub>2</sub> adsorption on 82MZ-g at 473 K for three times in the same condition.
